# Supplementary material for: Low-temperature fabrication of solution-processed hafnium oxide gate insulator films using a thermally purified solution process
Source: Royal Society of Chemistry journal article supplement (doi:10.1039/c8tc00899j), 2018-01-01
Supplement: c8tc00899j1.pdf [file c8tc00899j1.pdf]

## Supporting Information

### **Low-temperature fabrication of solution-processed HfO<sub>x</sub> gate insulator using thermally purified solution process**

*Jusung Chung<sup>a</sup>, ‡, Young Jun Taka, Won-Gi Kim<sup>a</sup>, Jeong Woo Park<sup>a</sup>, Tae Sang Kim<sup>b</sup>, Jun Hyung Lim<sup>b</sup> and Hyun Jae Kim<sup>a</sup>,\**

*<sup>a</sup>School of Electrical and Electronic Engineering, Yonsei University, 50 Yonsei-ro, Seodaemun-gu, Seoul 120-749, Republic of Korea.*

*<sup>b</sup>Frontier Technology Team, Display Research Center, Samsung Display, 1 Samsung-ro, Giheung-gu, Yongin-si, Gyeonggi-do, 17113 Republic of Korea*

*\*E-mail: [hjk3@yonsei.ac.kr](mailto:hjk3@yonsei.ac.kr)*

*‡ - Dual Contributors*

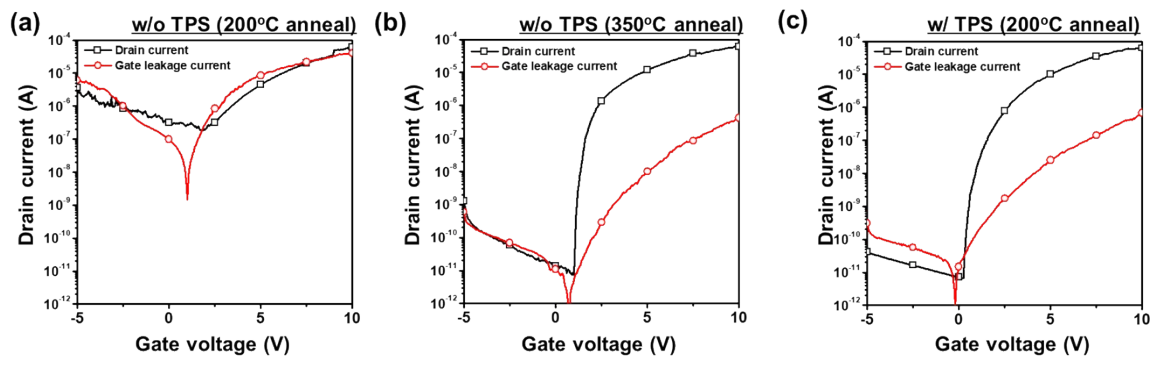

**Figure S1.** Gate leakage current of  $\text{In}_2\text{O}_3$  TFT with  $\text{HfO}_x$  without TPS annealed at (a) 200°C, (b) 350°C, and (c) with TPS annealed at 200°C

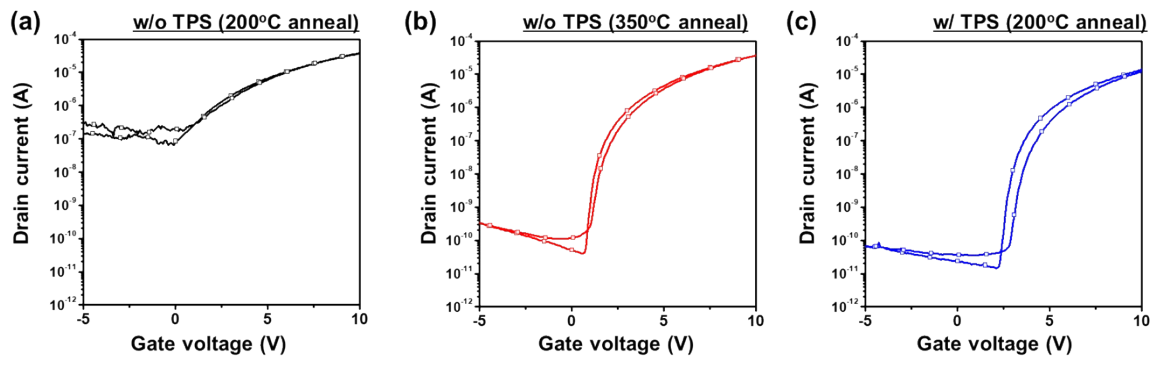

**Figure S2.** Hysteresis characteristics of  $\text{In}_2\text{O}_3$  TFT with  $\text{HfO}_x$  without TPS annealed at (a) 200°C, (b) 350°C, and (c) with TPS annealed at 200°C

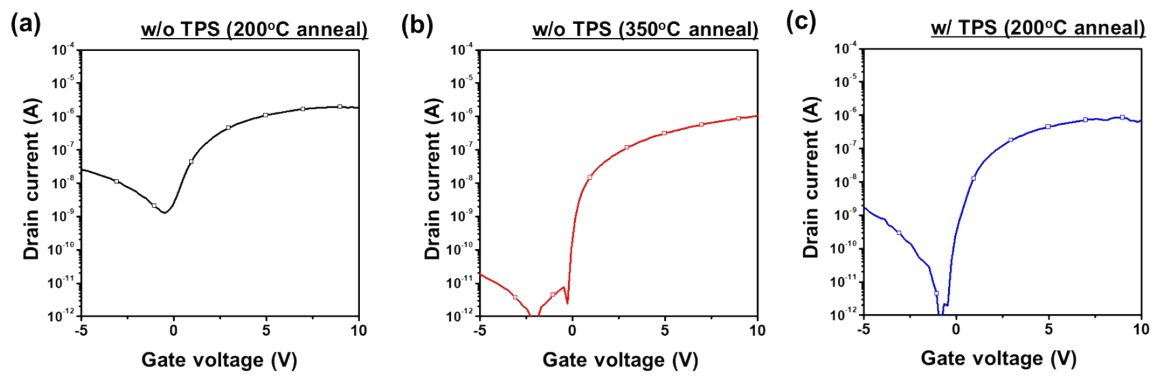

**Figure S3.** Transfer characteristics at linear region of In<sub>2</sub>O<sub>3</sub> TFT with HfO<sub>x</sub> without TPS annealed at (a) 200°C, (b) 350°C, and (c) with TPS annealed at 200°C

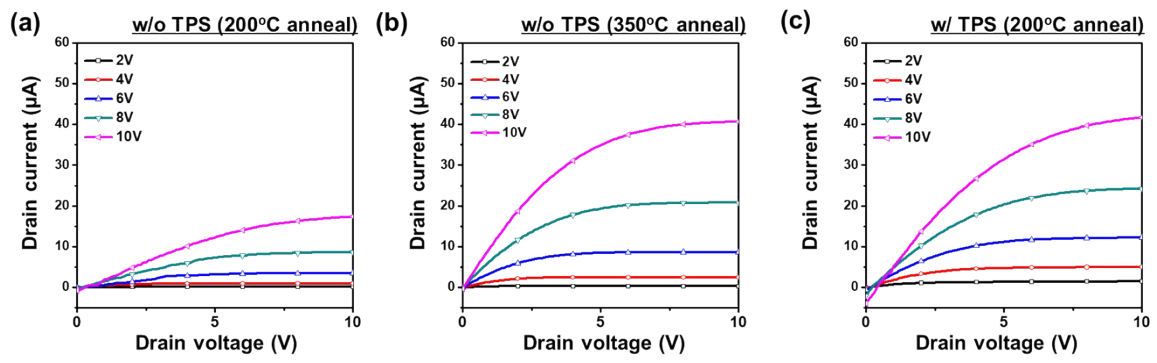

**Figure S4.** Output characteristics of In<sub>2</sub>O<sub>3</sub> TFT with HfO<sub>x</sub> without TPS annealed at (a) 200°C, (b) 350°C, and (c) with TPS annealed at 200°C
